# Supplementary material
Source: publisher figshare collection journal article supplement (https://tandf.figshare.com/articles/dataset/_/11791398)
Supplement: Supplementary file 2 [file 1]

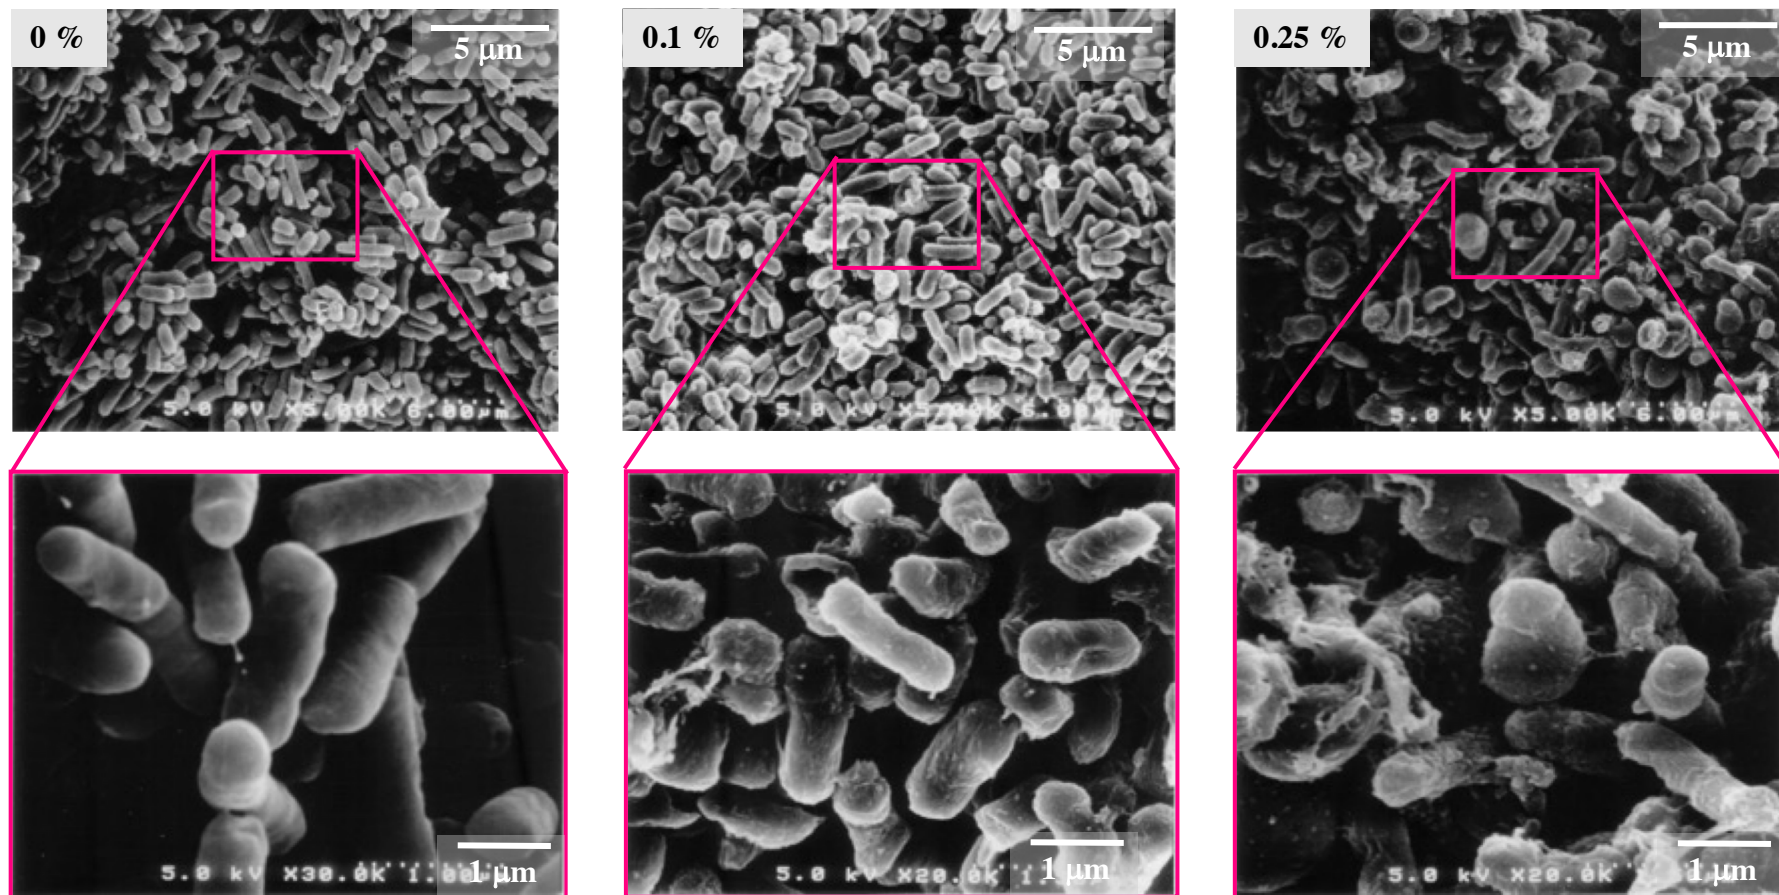

Figure S2. Scanning electron microscopy (SEM) images of *E. coli* after treatment with Chitosan-SO<sub>4</sub><sup>2-</sup> particles (chitosan: 85 kDa) at 0, 0.1, 2.5 wt%. Na<sub>2</sub>SO<sub>4</sub> addition: 0.5 equivalents per unit of glucosamine in the chitosan.
