# Supplementary material
Source: publisher figshare collection journal article supplement (https://tandf.figshare.com/articles/dataset/_/11791398)
Supplement: Supplementary file 3 [file 1]

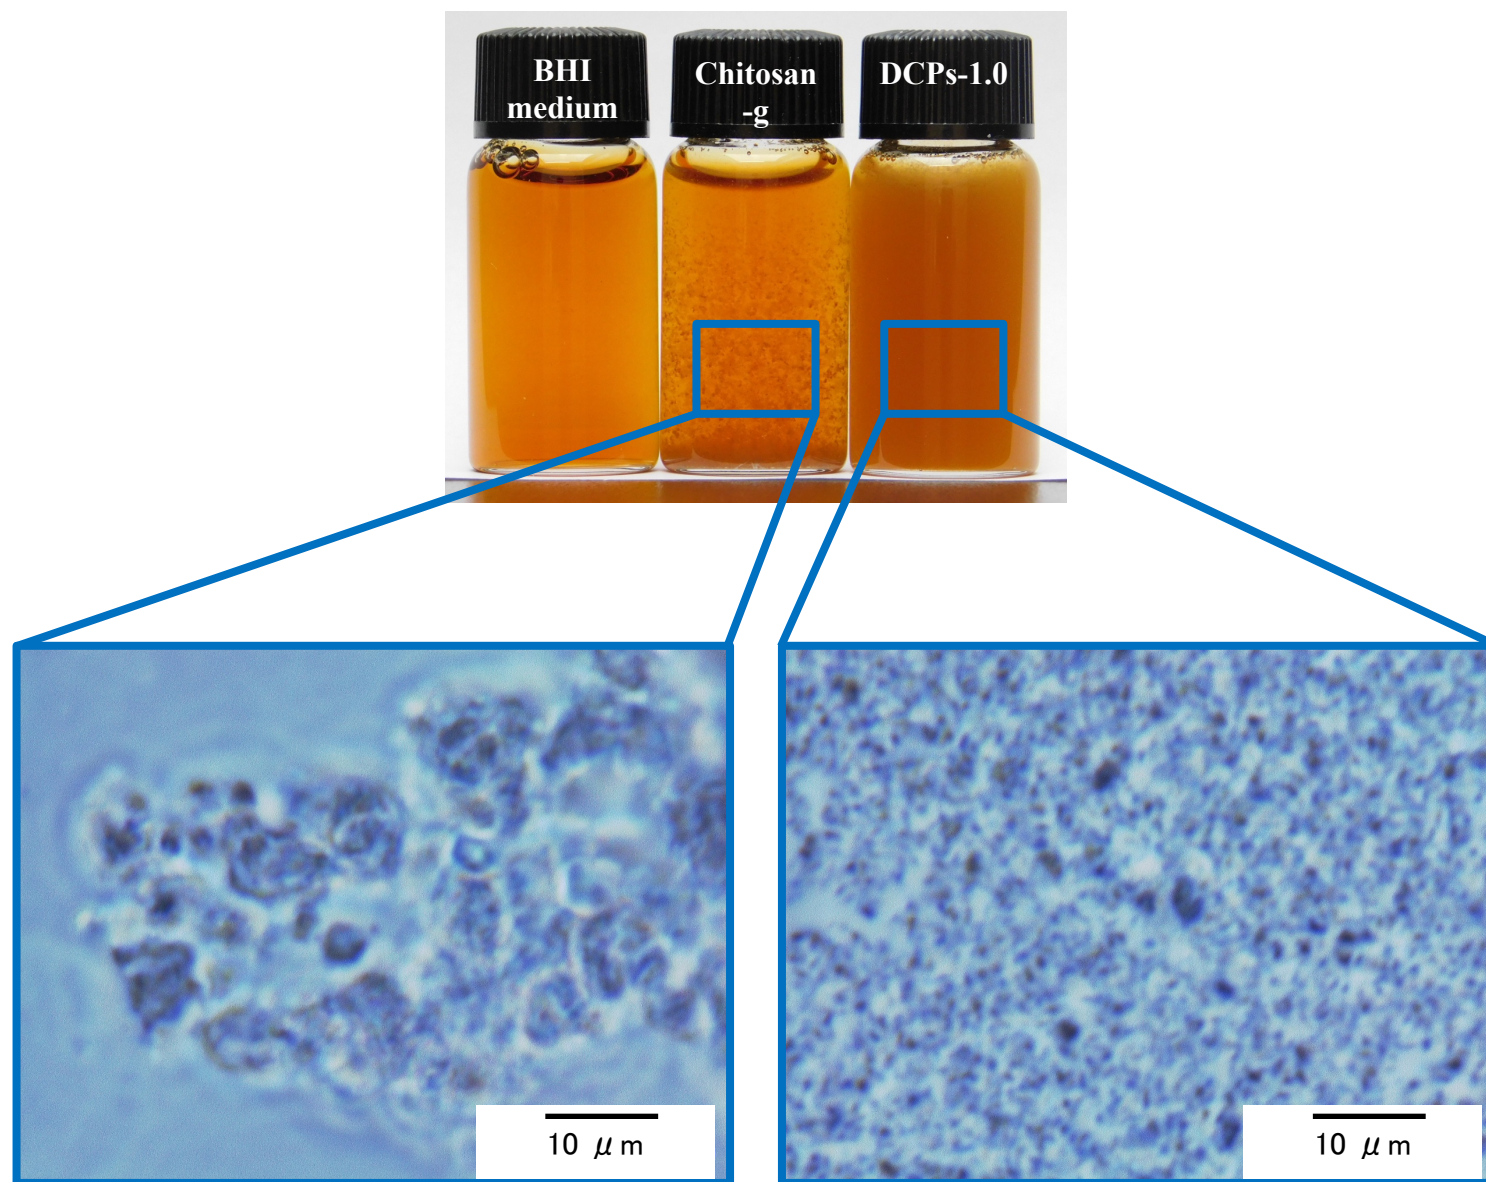

Figure S3. Stereomicroscope image and appearance of Chitosan-g and DCPs-1.0 dispersion in BHI medium, pH  $6.50\pm0.20$ .
