# Supplementary material
Source: publisher figshare collection journal article supplement (https://tandf.figshare.com/articles/dataset/_/11791398)

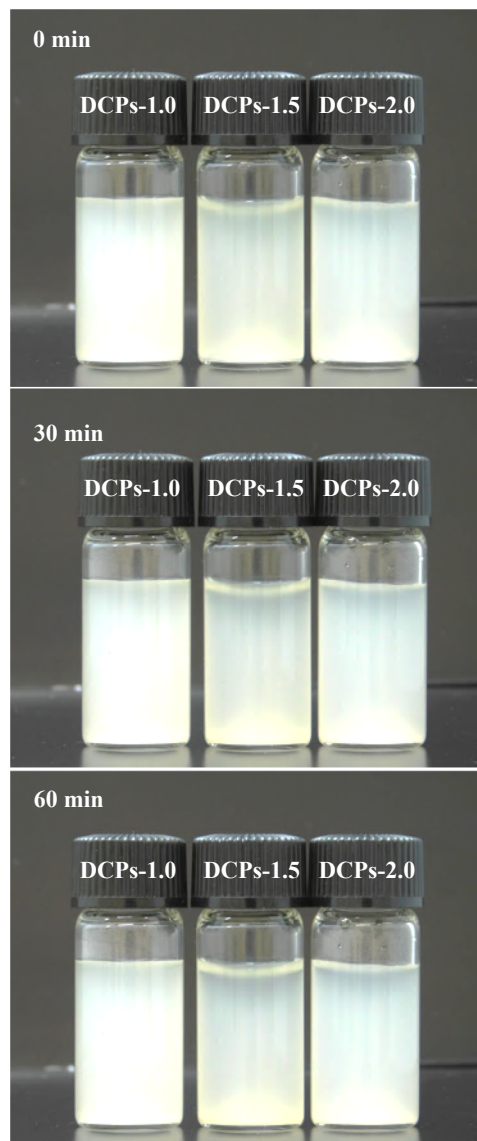

Figure S1. Photographs showing the turbidity of the DCPs-1.0, 1.5 and 2.0 in aqueous dispersion.

Supplement: Supplementary file 1 [file 1]
